# Supplementary material for: Bacterial Quorum-Sensing Peptides as Immune Modulators Present in Systemic Circulation
Source: MDPI journal article supplement (doi:10.3390/biom13020296), 2023-02-04
Supplement: s1 [file s1]

## Supplementary Information

### Supplementary Figure S1

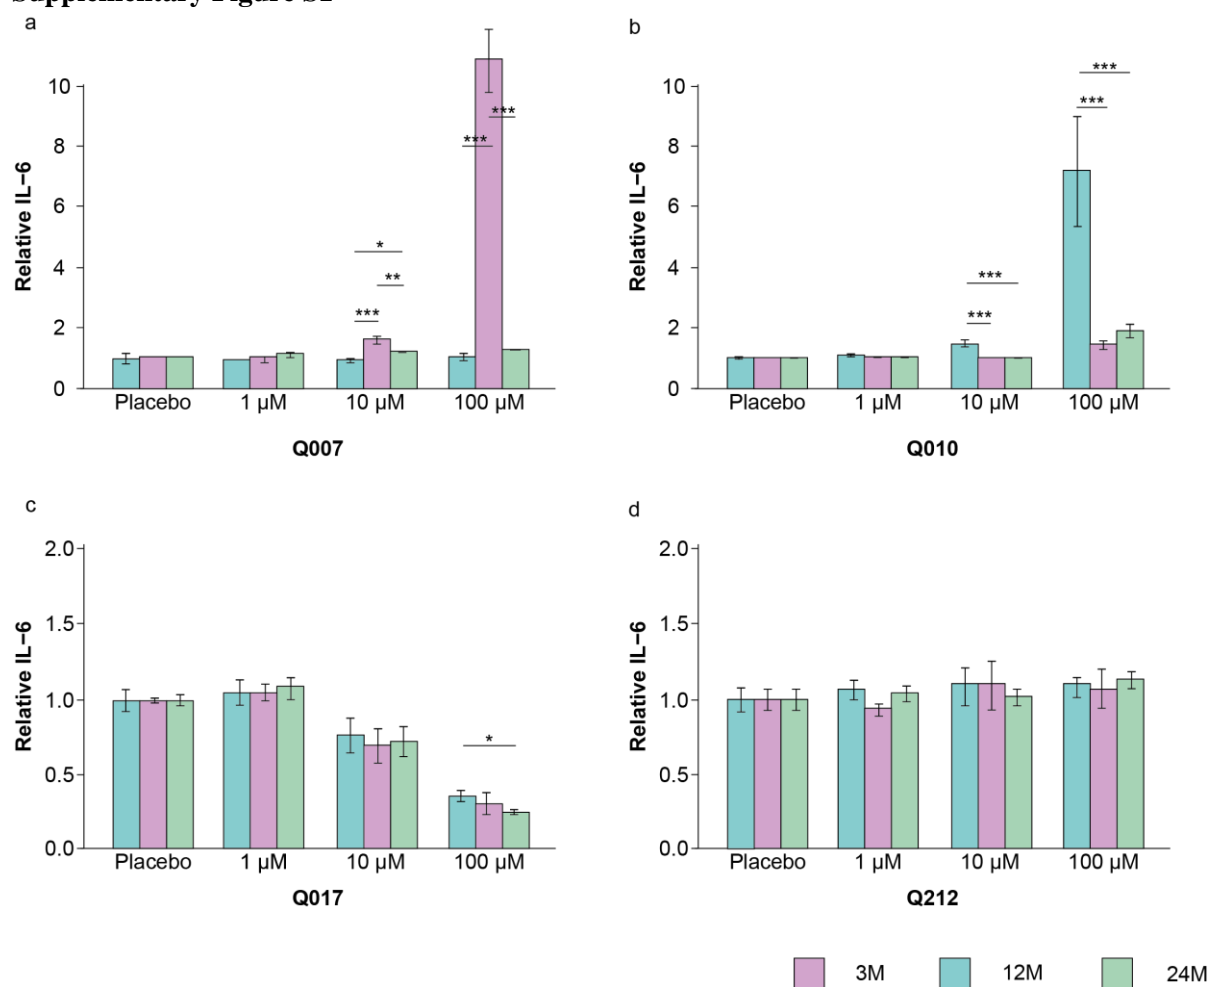

**Supplementary Figure S1.** Age-dependent results of IL-6 ELISA after 24h incubation of splenocytes with different concentrations QSPs. a) Q007; b) Q010; c) Q017 and d) Q212. Bars and numbers on top represent means, with error bars representing s.e.m. Asterisks indicate the following criteria of statistical significance: \*p<0.05 \*\*p<0.01 \*\*\*p<0.001 (Two-sided t-test between different ages within the same QSP concentration).

### Supplementary Figure S2

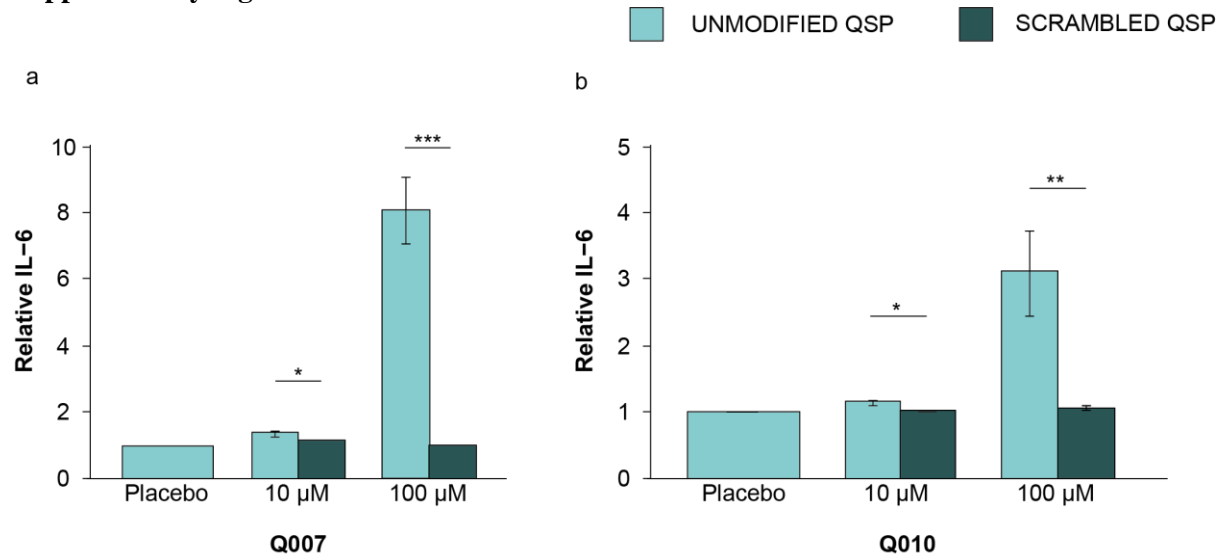

**Supplementary Figure S2.** Results of IL-6 ELISA after 24h incubation of splenocytes with different concentrations QSP in its unmodified (red) or scrambled (green) form. a) Q007; b) Q010. Bars represent means, with error bars representing s.e.m. Asterisks indicate the following criteria of statistical significance: \* $p \leq 0.05$  \*\* $p \leq 0.01$  \*\*\* $p \leq 0.001$  (Two-sided t-test between unmodified and scrambled form at specific concentration).

### Supplementary Figure S3

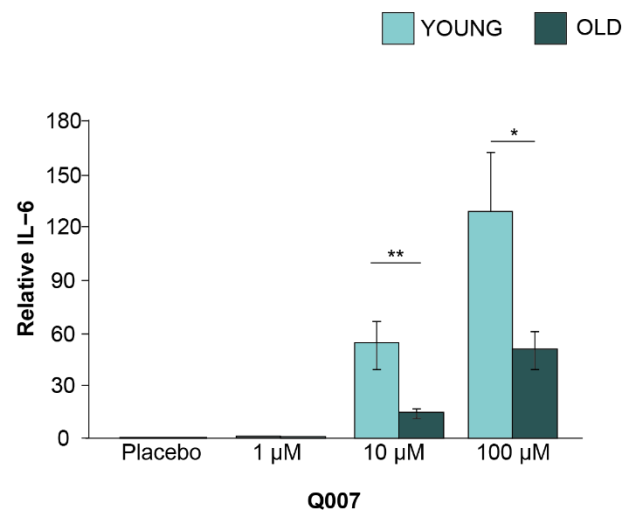

**Supplementary Figure S3.** Age-dependent results of IL-6 ELISA after 24h incubation of human PBMC's with different concentrations Q007. Bars represent means, with error bars representing s.e.m. Asterisks indicate the following criteria of statistical significance: \* $p \leq 0.05$  \*\* $p \leq 0.01$  (Two-sided t-test between different ages within the same QSP concentration).

### Supplementary Figure S4

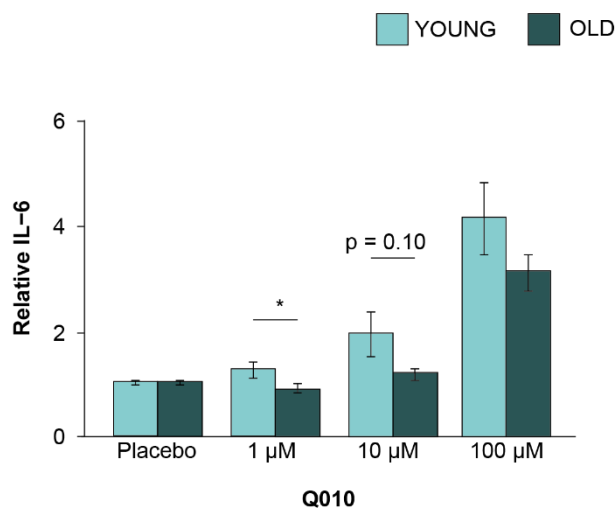

**Supplementary Figure S4.** Age-dependent results of IL-6 ELISA after 24h incubation of human PBMC's with different concentrations Q010. Bars and numbers on top represent means, with error bars representing s.e.m. Asterisks indicate the following criteria of statistical significance: \* $p \leq 0.05$  (Two-sided t-test between different ages within the same QSP concentration).

### Supplementary Table S1

**Table S1.** Average recovery, matrix effect and process efficiency of Q010 in human plasma determined on Xevo.

| QSP  | Parameter          | Matrix 1 | Matrix 2 | Matrix 3 | Overall | SD   | RSD  |
|------|--------------------|----------|----------|----------|---------|------|------|
| Q010 | Process yield      | 89.6%    |          |          |         |      |      |
|      | Recovery           | 107.2%   | 107.0%   | 107.9%   | 107.4%  | 0.4% | 0.4% |
|      | Matrix Effect      | 80.8%    | 78.8%    | 80.5%    | 80.0%   | 1.1% | 1.3% |
|      | Process efficiency | 86.6%    | 84.4%    | 86.8%    | 86.0%   | 1.4% | 1.6% |

### Supplementary Table S2

**Table S2.** Summary of coefficients (Coeff) for plasma cytokine concentration (PapR7I positive vs. negative) using propensity score overlap weighted linear regression (n = 39).

| Cytokine     | Coeff (95% CI)<br>PapR7I positive vs. negative | P-value      |
|--------------|------------------------------------------------|--------------|
| IL-6         | 1.38 (-4.28; 7.05)                             | 0.635        |
| IFN $\gamma$ | -2.21 (-3.95; -0.46)                           | <b>0.018</b> |
| MCP-1        | 6.81 (-32.9; 46.5)                             | 0.739        |
| IL-10        | -0.73 (-3.10; 1.63)                            | 0.548        |
| IL-18        | -71.8 (-159; 15.0)                             | 0.114        |
| IL-23        | -0.51 (-4.65; 3.62)                            | 0.809        |

|              |                     |       |
|--------------|---------------------|-------|
| IL-1 $\beta$ | -6.01 (-21.1; 9.07) | 0.440 |
| IL-33        | -11.5 (-26.0; 3.02) | 0.129 |
